# Supplementary material for: Learning About the History of Landscape Use for the Future: Consequences for Ecological and Social Systems in Swedish Bergslagen
Source: Springer Nature journal article supplement (doi:10.1007/s13280-012-0369-z), 2013-03-01
Supplement: MOESM1 [file 15653706]

Electronic Supplementary Material

**Learning about the history of landscape use for the future:  
consequences for ecological and social systems in Swedish Bergslagen**

Per Angelstam, Kjell Andersson, Maths Isacson, Dmitri V. Gavrilov, Robert Axelsson,  
Mattias Bäckström, Erik Degerman, Marine Elbakidze, Elena Yu. Kazakova-Apkarimova,  
Lotta Sartz, Stefan Sädbom, Johan Törnblom

**Table S1** Different definitions of Bergslagen used to compile the core of Bergslagen with parishes as minimum mapping units

| Id | Description                                                                                | Reference                                                                                                             | Type of data |
|----|--------------------------------------------------------------------------------------------|-----------------------------------------------------------------------------------------------------------------------|--------------|
| 1  | Bergslager in Sweden                                                                       | Atlas of Sweden's Bergslager Geijerstam and Nisser (2011)                                                             | Printed map  |
| 2  | Bergslagen border                                                                          | Nordisk familjebok (1925)                                                                                             | Printed map  |
| 3  | Mining areas                                                                               | Seebass (1928)                                                                                                        | Printed map  |
| 4  | Bergslagen Geological extent 1916                                                          | Seebass (1928)                                                                                                        | Printed map  |
| 5  | Iron industry 1919                                                                         | Seebass (1928)                                                                                                        | Printed map  |
| 6  | Culture Geographical province 1918                                                         | Seebass (1928)                                                                                                        | Printed map  |
| 7  | Rural area Bergslagen 1918                                                                 | Seebass (1928)                                                                                                        | Printed map  |
| 8  | Rural area Bergslagen 1921                                                                 | Seebass (1928)                                                                                                        | Printed map  |
| 9  | Region Bergslagen 1925                                                                     | Seebass (1928)                                                                                                        | Printed map  |
| 10 | Topographic Bergslagen 1927                                                                | Seebass (1928)                                                                                                        | Printed map  |
| 11 | Agricultural census Bergslagen                                                             | Jordbruksräkningen (1932)                                                                                             | Description  |
| 12 | Bergslagen in sense of legal framework for the iron works at the time, "brukslagstiftning" | Heckscher (1935–49)                                                                                                   | Printed map  |
| 13 | Bergslagsgruppen                                                                           | Arpi (1951)                                                                                                           | Printed map  |
| 14 | Bergslagsområdet                                                                           | Carlquist and Carlsson (1962)                                                                                         | Printed map  |
| 15 | Bergslagen as agricultural region                                                          | W:son Ahlmann et al. (1966:352)                                                                                       | Printed map  |
| 16 | Sweden's mines and mineralizations                                                         | SGU (2011)                                                                                                            | Printed map  |
| 17 | Bergslaget – member municipalities                                                         | www.bergslaget.com                                                                                                    | Description  |
| 18 | Parishes containing places with businesses having Bergslagen in their name                 | Eniro, www.eniro.se, retrieved 23 April 2012                                                                          | Analysis     |
| 19 | Trains in Bergslagen - Parishes within a buffer of 20 km from railways.                    | Using GIS we made a 20-km buffer around the railway line (Linjekarta, www.tagibergslagen.se, retrieved 23 April 2012) | Analysis     |
| 20 | Bergskraft Bergslagen.                                                                     | Based on the map National bedrock data, SGU 2007.                                                                     | Digital map  |
| 21 | Ekomuseum Bergslagen                                                                       | www.ekomuseum.se                                                                                                      | Digital map  |
| 22 | Leader Bergslagen                                                                          | www.leaderbergslagen.se                                                                                               | Digital map  |

## **References**

- Carlquist, G., and J. Carlsson. 1962. Väderleksförutsägelse. [Weather forecasts]. *Svensk Uppslagsbok* 31: 873 (in Swedish).
- Geijerstam, J., and M. Nisser. 2011. *Swedish Mining and Metalworking – Past and Present. National Atlas of Sweden*. Stockholm: Norstedts Förlagsgrupp AB.
- Jordbruksräkningen. 1932. Stockholm: Statistiska centralbyrån (in Swedish).
- Heckscher, E. 1935–49. *Sveriges ekonomiska historia från Gustav Vasa. [Sweden's economic history from Gustav Vasa]*. Stockholm: Albert Bonniers förlag (in Swedish).
- Nordisk Familjebok. 1925. *Bergslagen*. Malmö: Nordisk Familjeboks förlag (in Swedish).
- Seebass, F. 1928. *Bergslagen: Versuch einer kulturgeographischen Beschreibung und Umgrenzung. [Bergslagen: An attempt to human geogographical description and delimitation]*. Greifswald: J. Abel, g.m.b.h. (in German).
- W:son Ahlmann, H., G. Arpi, G. Hoppe, and C. M:son Mannerfelt. 1966. *Sverige. Land och folk [Sweden: Land and people]*. Stockholm: Natur och Kultur (in Swedish).
- SGU. 2007. National Bedrock Data, Geological Survey of Sweden, 13p, Uppsala (in Swedish).
- SGU. 2011. Statistics of the Swedish Mining Industry 2010. Periodiska publikationer 2011:2. Uppsala: Geological Survey of Sweden.
